# Supplementary material
Source: MDPI journal article supplement (https://www.mdpi.com/2304-6740/11/4/156)
Supplement: s1 [file s1]

# Designing Highly Active S-g-C<sub>3</sub>N<sub>4</sub>/Te@NiS Ternary Nanocomposites for Antimicrobial Performance, Degradation of Organic Pollutants, and Their Kinetic Study

Maryam Ramzan <sup>1</sup>, Mohsin Javed <sup>1</sup>, Shahid Iqbal <sup>2,\*</sup>, Ahmad Alhujaily <sup>3</sup>, Qaiser Mahmood <sup>4</sup>, Komal Aroosh <sup>1</sup>, Ali Bahadur <sup>5,\*</sup>, Muhammad Abdul Qayyum <sup>6</sup>, Nasser S. Awwad <sup>7</sup>, Hala A. Ibrahim <sup>8</sup>, Murefah Mana Al-Anazy <sup>9</sup> and Eslam B. Elkaeed <sup>10</sup>

<sup>1</sup> Department of Chemistry, School of Science, University of Management and Technology, Lahore 54770, Pakistan

<sup>2</sup> Department of Chemistry, School of Natural Sciences (SNS), National University of Science and Technology (NUST), H-12, Islamabad 46000, Pakistan

<sup>3</sup> Biology Department, College of Science, Taibah University, Al Madinah Al Munawarah 41477, Saudi Arabia

<sup>4</sup> Chemistry and Chemical Engineering Guangdong Laboratory, Shantou 515031, China

<sup>5</sup> Department of Chemistry, College of Science and Technology, Wenzhou-Kean University, Wenzhou 325060, China

<sup>6</sup> Department of Chemistry, Division of Science & Technology, University of Education, Lahore 54770, Pakistan

<sup>7</sup> Chemistry Department, Faculty of Science, King Khalid University, P.O. Box 9004, Abha 61413, Saudi Arabia

<sup>8</sup> Biology Department, Faculty of Science, King Khalid University, P.O. Box 9004, Abha 61413, Saudi Arabia

<sup>9</sup> Department of Chemistry, College of Science, Princess Nourah bint Abdulrahman University, P.O. Box 84428, Riyadh 11671, Saudi Arabia

<sup>10</sup> Department of Pharmaceutical Sciences, College of Pharmacy, AlMaarefa University, Riyadh 13713, Saudi Arabia

\* Correspondence: abahadur@wku.edu.cn (A.B.) and shahidiqbal.chem@sns.nust.edu.pk (S.I.)

## 2.8. Characterization techniques

The synthesized samples were characterized employing modern instruments. A SEM-EDS (Hitachi, S-4800) was used to assess the elemental content and morphology of the synthesized samples, while XRD (Bruker AXS, D8-S4) was used to determine their structure. The photocatalytic absorption spectra were determined using a UV-vis-NIR spectrophotometer (UV-770, Jasco). FT-IR spectrometers (Perkin 400 FT-IR) were used to determine the functional groups. On a Kratos Axis-Ultra multifunctional X-ray spectrometer, XPS evaluations were carried out. The electron spin resonance (ESR) signals were collected on a JES FA200, JEOL Co. spectrometer with the 5,5-dimethyl-1-pyrroline-N-oxide (DMPO) solvent.

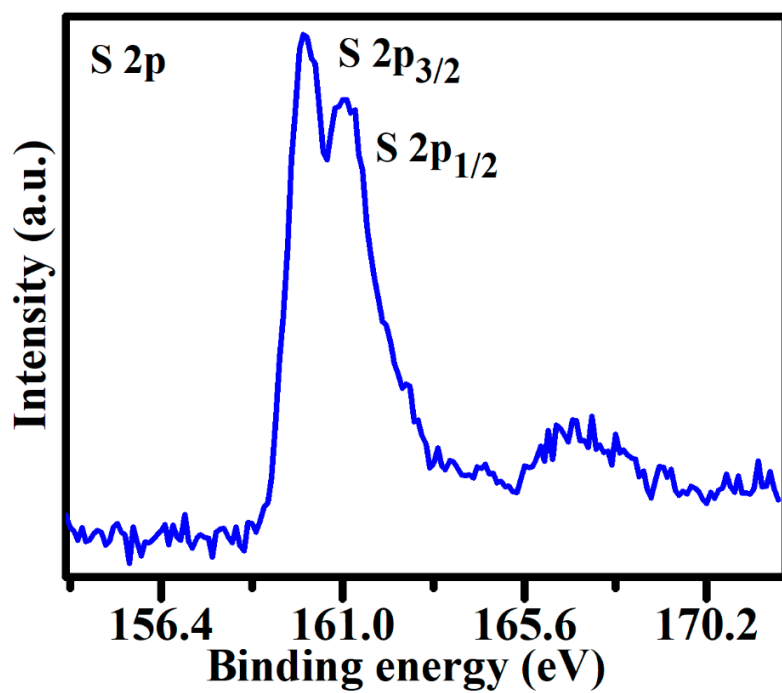

**Figure S1.** High-resolution S 2p XPS spectrum of 70%SGCN/1%Te@NiS NCs.
